# Supplementary material for: STAG2 regulates interferon signaling in melanoma via enhancer loop reprogramming
Source: PubMed Central journal article supplement (PMC8986786; doi:10.1038/s41467-022-29541-9), 2022-04-06
Supplement: 41467_2022_29541_MOESM3_ESM.pdf [file 41467_2022_29541_MOESM3_ESM.pdf]

### **Description of additional supplementary Data files**

Supplementary Data 1. Raw data quality control (QC) results across processing steps for Hi-C and HiChIP samples. The fraction of uniquely aligned read pairs was calculated based on the total number of initial reads. Self-circle and dangling-end fractions were calculated based on the total number of aligned read pairs. Intra- and inter-chromosomal contacts were calculated as a fraction of filtered valid interactions.
